# Supplementary material for: Projection of the health and economic impacts of Chronic kidney disease in the Chilean population
Source: PLOS journal article supplement (doi:10.1371/journal.pone.0256680), 2021-09-08
Supplement: S1 (10.1371/journal.pone.0256680.s001) [file journal.pone.0256680.s001]

**S1 Fig. Classification of CKD**

|                                                                              |     |                                  |       | Persistent Albuminuria Categories<br>Description and Range |                      |                    |
|------------------------------------------------------------------------------|-----|----------------------------------|-------|------------------------------------------------------------|----------------------|--------------------|
|                                                                              |     |                                  |       | A1                                                         | A2                   | A3                 |
|                                                                              |     |                                  |       | Normal to mildly increased                                 | Moderately increased | Severely increased |
|                                                                              |     |                                  |       | ACR <30 mg/g                                               | ACR of 30-300 mg/g   | ACR >300 mg/g      |
| GFR Categories<br>(mL/min per 1.73 m <sup>2</sup> )<br>Description and Range | G1  | Normal or high                   | ≥90   | 1 if CKD                                                   | 1                    | 2                  |
|                                                                              | G2  | Mildly decreased                 | 60-89 | 1 if CKD                                                   | 1                    | 2                  |
|                                                                              | G3a | Mildly to moderately decreased   | 45-59 | 1                                                          | 2                    | 3                  |
|                                                                              | G3b | Moderately to severely decreased | 30-44 | 2                                                          | 3                    | 3                  |
|                                                                              | G4  | Severely decreased               | 15-29 | 3                                                          | 3                    | 4+                 |
|                                                                              | G5  | Kidney failure                   | <15   | 4+                                                         | 4+                   | 4+                 |

*Source:* Kidney Disease: Improving Global Outcomes group. The numbers in the grid are the recommendations by KDIGO to the frequency of monitoring (in times per year).
